# Supplementary material for: Algorithmic guided screening of drug combinations of arbitrary size for activity against cancer cells
Source: Oxford University Press journal article supplement (doi:10.1158/1535-7163.mct-08-0937), 2009-03-01
Supplement: 15357163mct080937-sup-mct-08-0937--suppl_fig_2.pdf [file 15357163mct080937-sup-mct-08-0937--suppl_fig_2.pdf]

**A**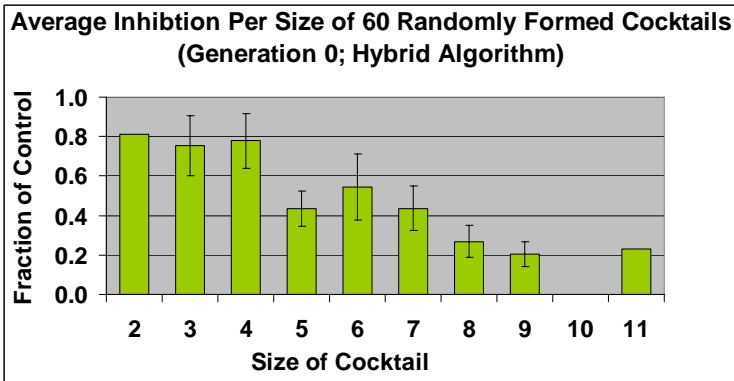**B**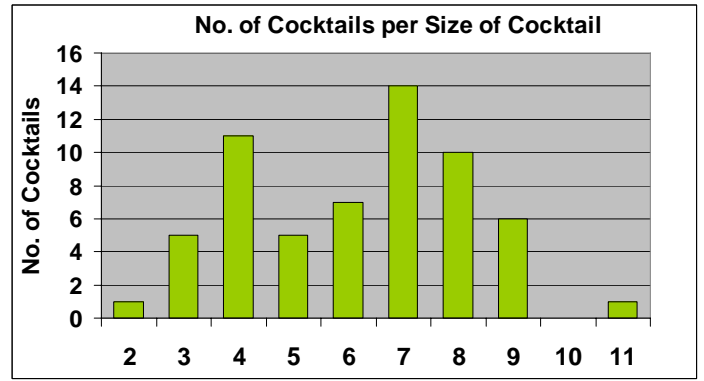**C**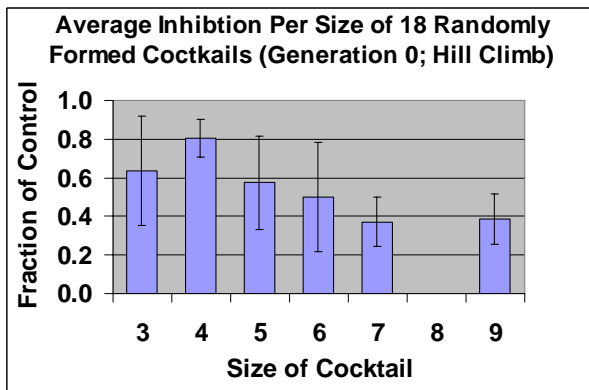**D**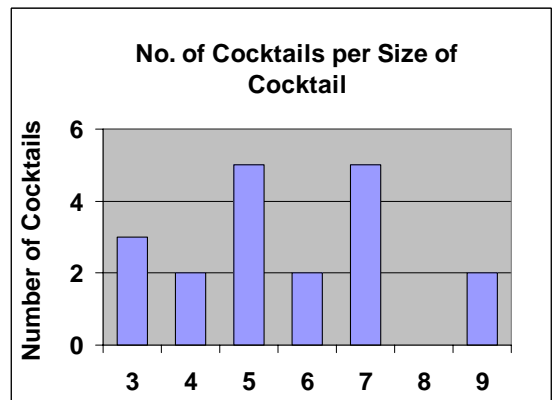

**Figure S2.** **A**, average inhibition per cocktail of a set of 60 randomly formed cocktails from prior experiments<sup>1,2</sup>. **B**, distribution of these cocktails by size. **C**, average inhibition per cocktail of 18 randomly formed cocktails from the initial generation of the hill climb. **D**, distribution of these 18 cocktails by size.
