# Supplementary material for: Algorithmic guided screening of drug combinations of arbitrary size for activity against cancer cells
Source: Oxford University Press journal article supplement (doi:10.1158/1535-7163.mct-08-0937), 2009-03-01
Supplement: 15357163mct080937-sup-mct-08-0937--suppl_fig_3.pdf [file 15357163mct080937-sup-mct-08-0937--suppl_fig_3.pdf]

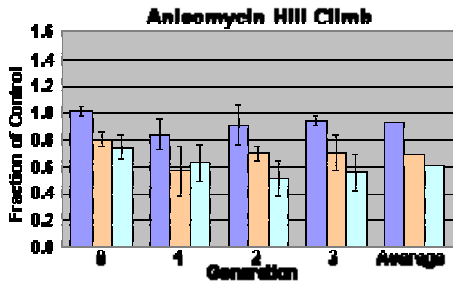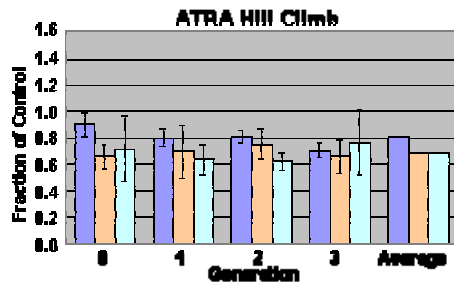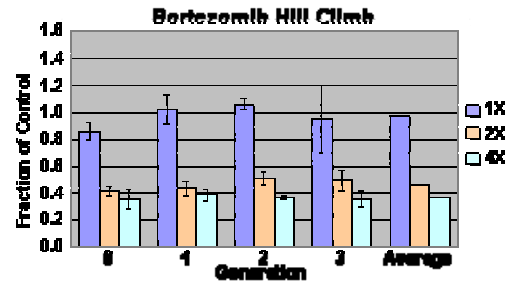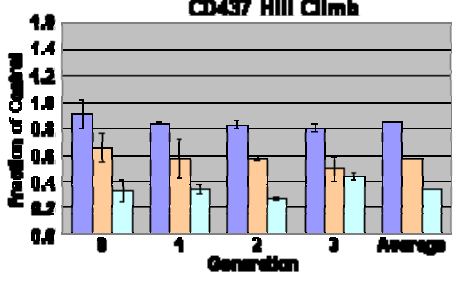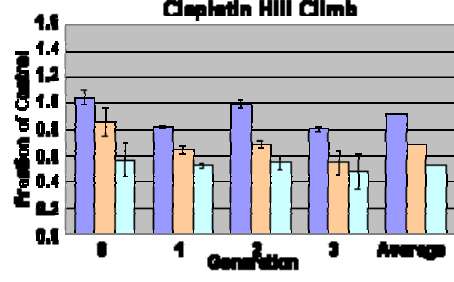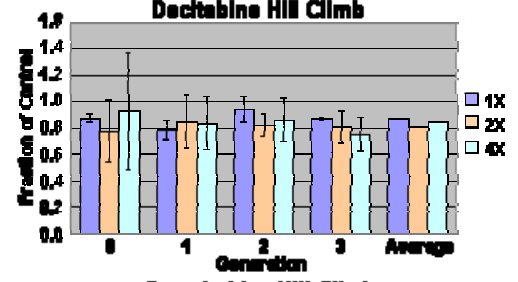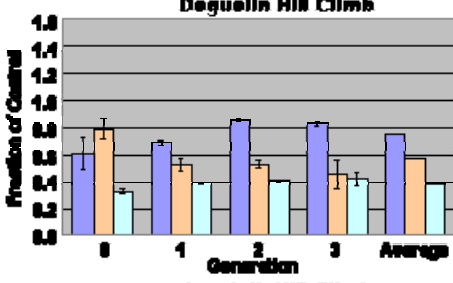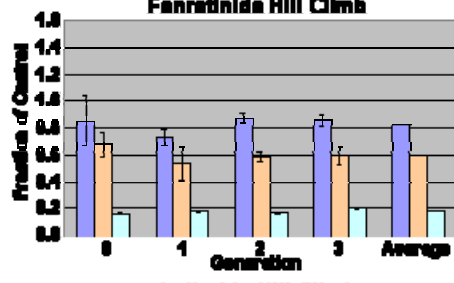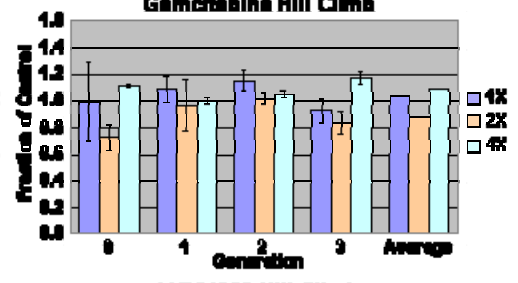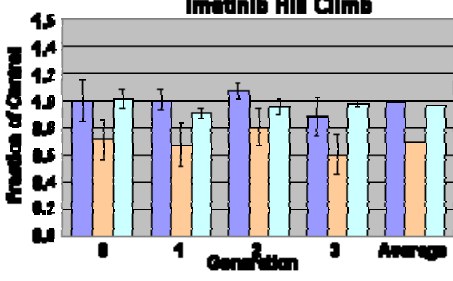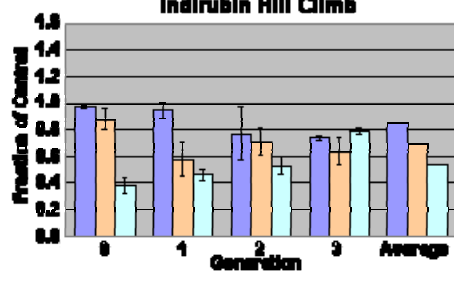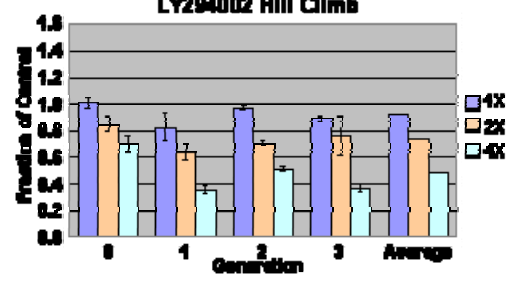

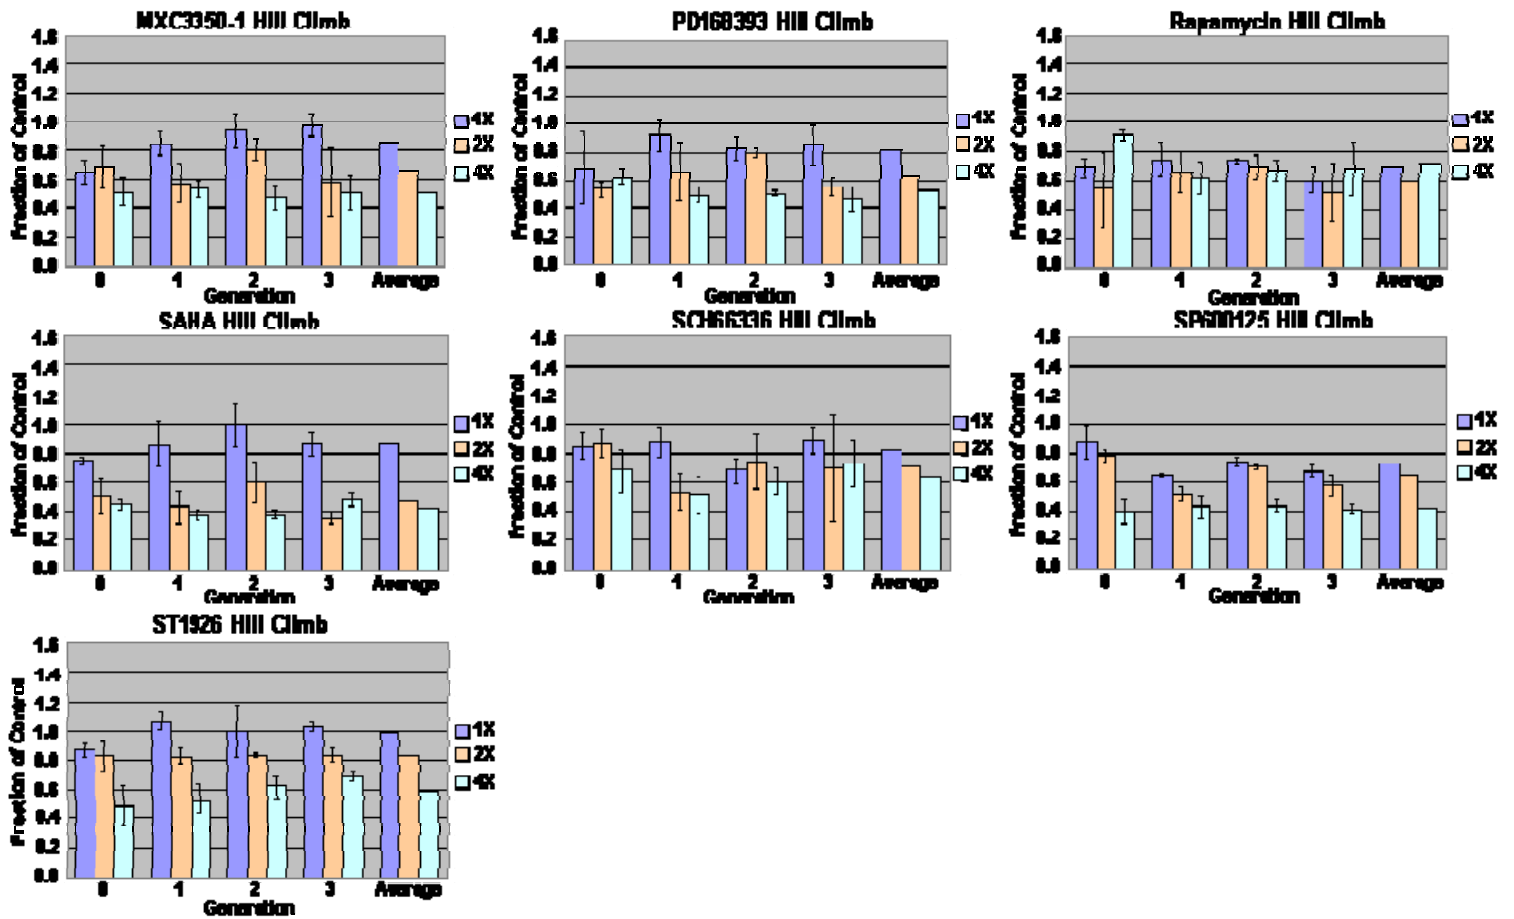

**Figure S3.** Each chart represents the behavior of a drug as a single agent at the 1x, 2x and 4x doses across the generations of the hill climb. The averages of the 1x, 2x, and 4x values across all of the generations for a given drug are indicated by the bars at the right of each chart. These latter values correspond to the values listed in Table 1. For the average of all 19 single agents per generation, see Fig. 2C.
