# Supplementary material for: Algorithmic guided screening of drug combinations of arbitrary size for activity against cancer cells
Source: Oxford University Press journal article supplement (doi:10.1158/1535-7163.mct-08-0937), 2009-03-01
Supplement: 15357163mct080937-sup-mct-08-0937--suppl_table_1.pdf [file 15357163mct080937-sup-mct-08-0937--suppl_table_1.pdf]

| Combination                              | A549 | HCC 827 | HCC 2229 | calu-3 | H1975 | H226 | H441 | PC-14 | Avg. Across All Cell Lines |
|------------------------------------------|------|---------|----------|--------|-------|------|------|-------|----------------------------|
| Single Agents                            |      |         |          |        |       |      |      |       |                            |
| F                                        | 0.95 | 1.02    | 0.95     | 1.14   | 0.95  | 1.17 | 1.13 | 1.07  | 1.05                       |
| A                                        | 0.82 | 1.00    | 1.00     | 0.54   | 0.94  | 0.75 | 1.07 | 1.03  | 0.89                       |
| S                                        | 0.89 | 0.97    | 0.87     | 0.87   | 0.84  | 1.44 | 0.79 | 1.06  | 0.97                       |
| B                                        | 0.87 | 1.03    | 0.68     | 0.91   | 0.56  | 0.94 | 0.55 | 1.13  | 0.83                       |
| Avg. Inhib. Single Agents (avg. fitness) | 0.88 | 1.01    | 0.88     | 0.87   | 0.82  | 1.07 | 0.88 | 1.07  | 0.94 (-1.04)               |
| Doublets                                 |      |         |          |        |       |      |      |       |                            |
| FS                                       | 0.55 | 0.87    | 0.93     | 0.55   | 0.63  | 1.00 | 0.27 | 1.05  | 0.73                       |
| AS                                       | 0.73 | 0.85    | 0.94     | 0.66   | 0.72  | 1.21 | 0.70 | 1.06  | 0.86                       |
| FB                                       | 0.51 | 1.00    | 0.81     | 0.47   | 0.35  | 0.65 | 0.26 | 1.04  | 0.64                       |
| AB                                       | 0.71 | 1.04    | 1.01     | 0.51   | 0.56  | 0.60 | 0.40 | 1.07  | 0.74                       |
| SB                                       | 0.62 | 0.94    | 0.92     | 0.55   | 0.56  | 0.87 | 0.41 | 1.05  | 0.74                       |
| Avg. Inhib. Doublets (avg. fitness)      | 0.62 | 0.94    | 0.92     | 0.55   | 0.56  | 0.87 | 0.41 | 1.05  | 0.74 (-0.94)               |
| Triplets                                 |      |         |          |        |       |      |      |       |                            |
| FSB                                      | 0.21 | 0.80    | 0.35     | 0.32   | 0.20  | 0.33 | 0.18 | 0.30  | 0.34                       |
| ASV                                      | 0.37 | 0.82    | 0.59     | 0.40   | 0.25  | 0.37 | 0.25 | 0.82  | 0.48                       |
| Avg. Inhib. Triplets (avg. fitness)      | 0.29 | 0.81    | 0.47     | 0.36   | 0.22  | 0.35 | 0.21 | 0.56  | 0.41 (-0.71)               |

**Table S1.** This is a numerical tally of the inhibition or K(s) for the power sets (the set of all subsets) of FSB and ASB across 8 NSCLC cell lines. The values are the ratio of treatment to each cell line's own no-treatment control. The combinations containing fenretinide are highlighted in yellow and ATRA in blue. A549 was tested on four occasions (in triplicate each time), with the average of these shown. The H226 experiment was repeated once, with the average shown. K(s) for single agents, doublets and triplets per cell line and across all cell lines are indicated. Abbreviations are: fenretinide (F), ATRA (A), SAHA (S), and bortezomib (B). These results are also shown as a chart in Fig. 3.
